# Supplementary material
Source: PubMed Central journal article supplement (PMC2442317)
Supplement: M710018200_1.pdf [file M710018200_1.pdf]

## Supplemental Figure 1

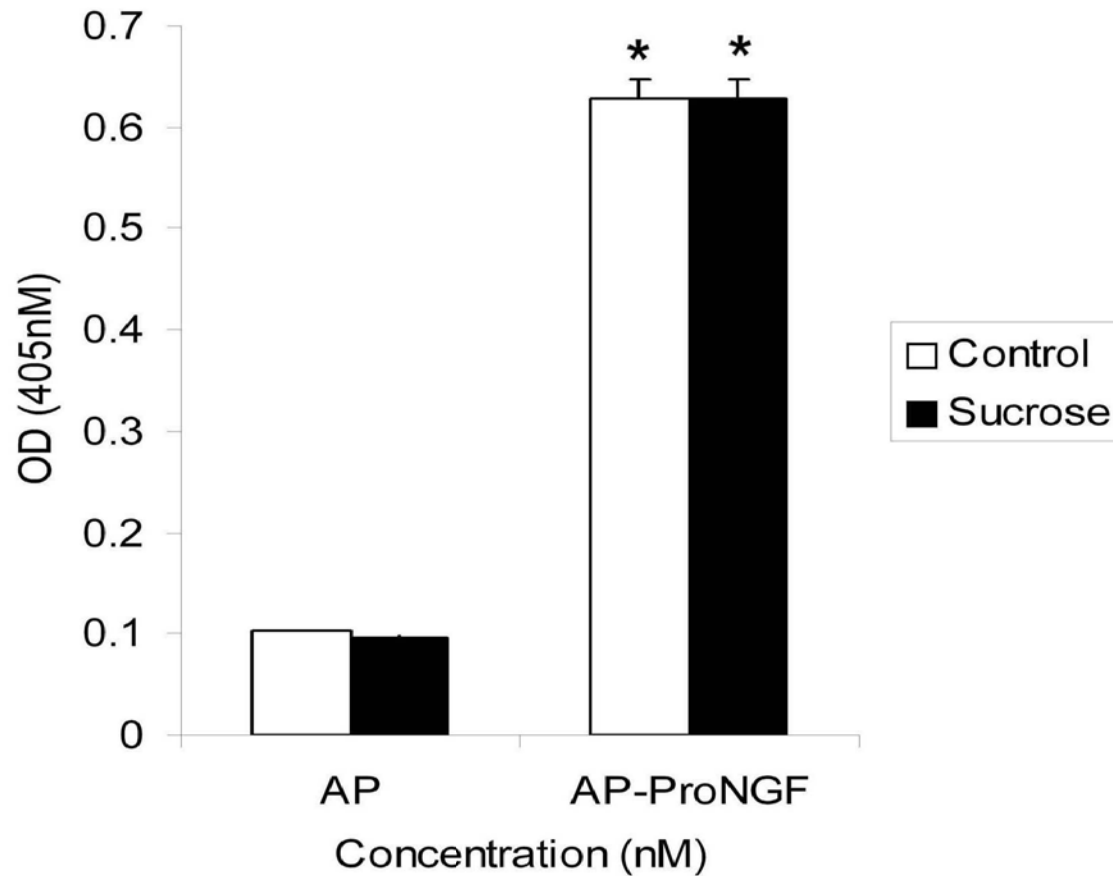

Supplemental Figure 1: Sucrose treatment does not alter binding of AP-proNGF to PC12 cells. Binding assays were performed on PC12 cells in the absence or presence of 350 mM sucrose. Values represent four wells assayed in quadruplicate. '\*' indicate differences between AP alone versus AP-ProNGF with  $P < 0.001$ , Error bars represent standard deviation. Experiments was repeated twice, with identical results.

## Supplemental Figure 2

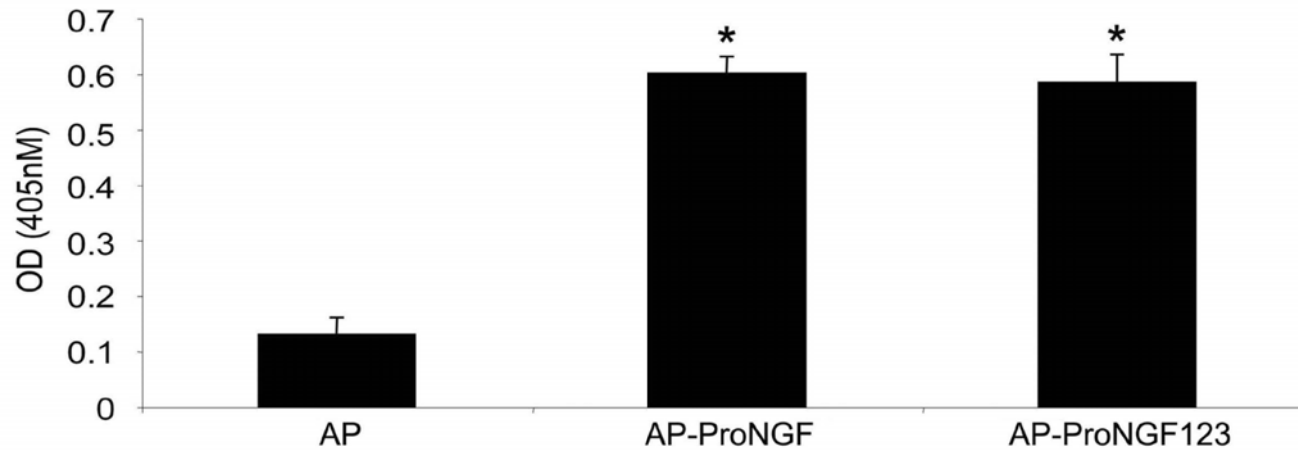

Supplemental Figure 2: AP-proNGF and AP-proNGF123 both bind p75NTR. Binding assays were performed on HEK293T cells transfected with p75NTR. Values represent four wells assayed in quadruplicate. "\*" indicate differences between AP alone versus AP-ProNGF or versus AP-ProNGF123 with  $P < 0.001$ , Error bars represent standard deviation. Experiments was repeated twice, with identical results.
